# Supplementary material for: Heat-set supramolecular polymer gel and decomposition by guests
Source: Royal Society of Chemistry journal article supplement (doi:10.1039/d2nj04782a), 2022-12-05
Supplement: d2nj04782a1.pdf [file d2nj04782a1.pdf]

## Supporting Information

### Heat-set supramolecular polymer gel and decomposition by guests

Surajit Singh,<sup>†</sup>Ananda Shit,<sup>†</sup>Sahabaj Mondal,<sup>†</sup>Olamilekan Joseph Ibukun<sup>†</sup> and Debasish Haldar<sup>\*†</sup>

<sup>†</sup>Department of Chemical Sciences, Indian Institute of Science Education and Research  
Kolkata, Mohanpur 741246, Nadia, West Bengal, India.

Fax: +913325873020; Tel: +913325873119;

E-mail: [deba\\_h76@yahoo.com](mailto:deba_h76@yahoo.com); [deba\\_h76@iiserkol.ac.in](mailto:deba_h76@iiserkol.ac.in)

#### Table of contents

|                             |    |
|-----------------------------|----|
| 1. Figure S1                | S2 |
| 2. Figure S2                | S2 |
| 3. Figure S3                | S3 |
| 4. Figure S4                | S4 |
| 5. Figure S5                | S4 |
| 6. Figure S6                | S5 |
| 7. Figure S7                | S5 |
| 8. Figure S8                | S6 |
| 9. Figure S9                | S6 |
| 10. Figure S10              | S7 |
| 11. Figure S11              | S7 |
| 12. Figure S12              | S7 |
| 13. Synthesis of Compound 1 | S8 |

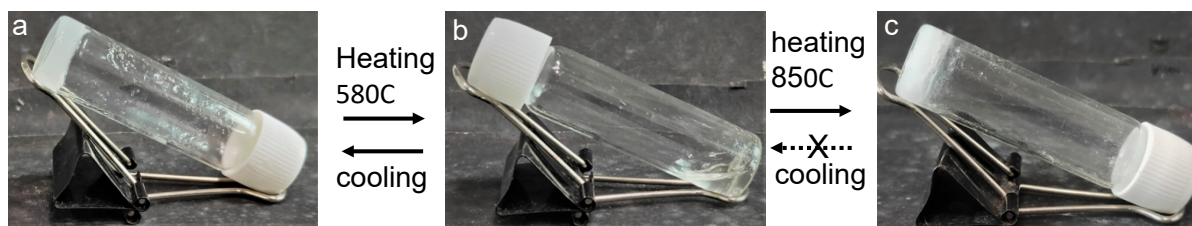

**Figure S1:**Transformation from GelA to sol to GelB.

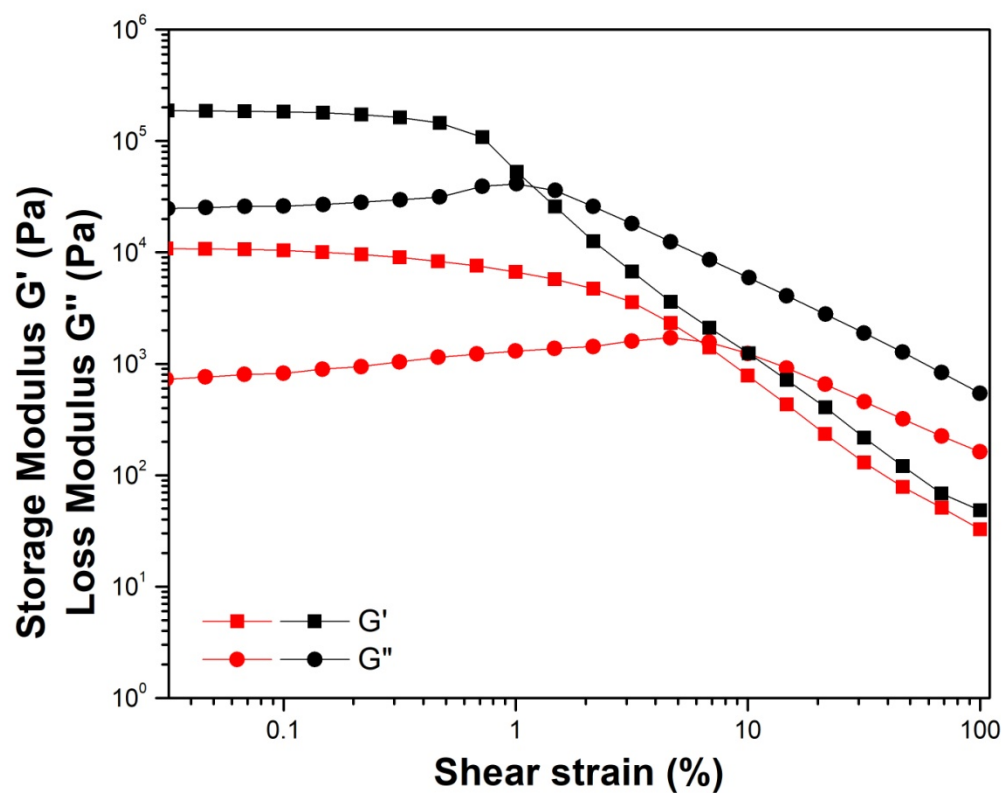

**Figure S2:**Comparison of modulus of gelA (red colour) and gelB (black colour).

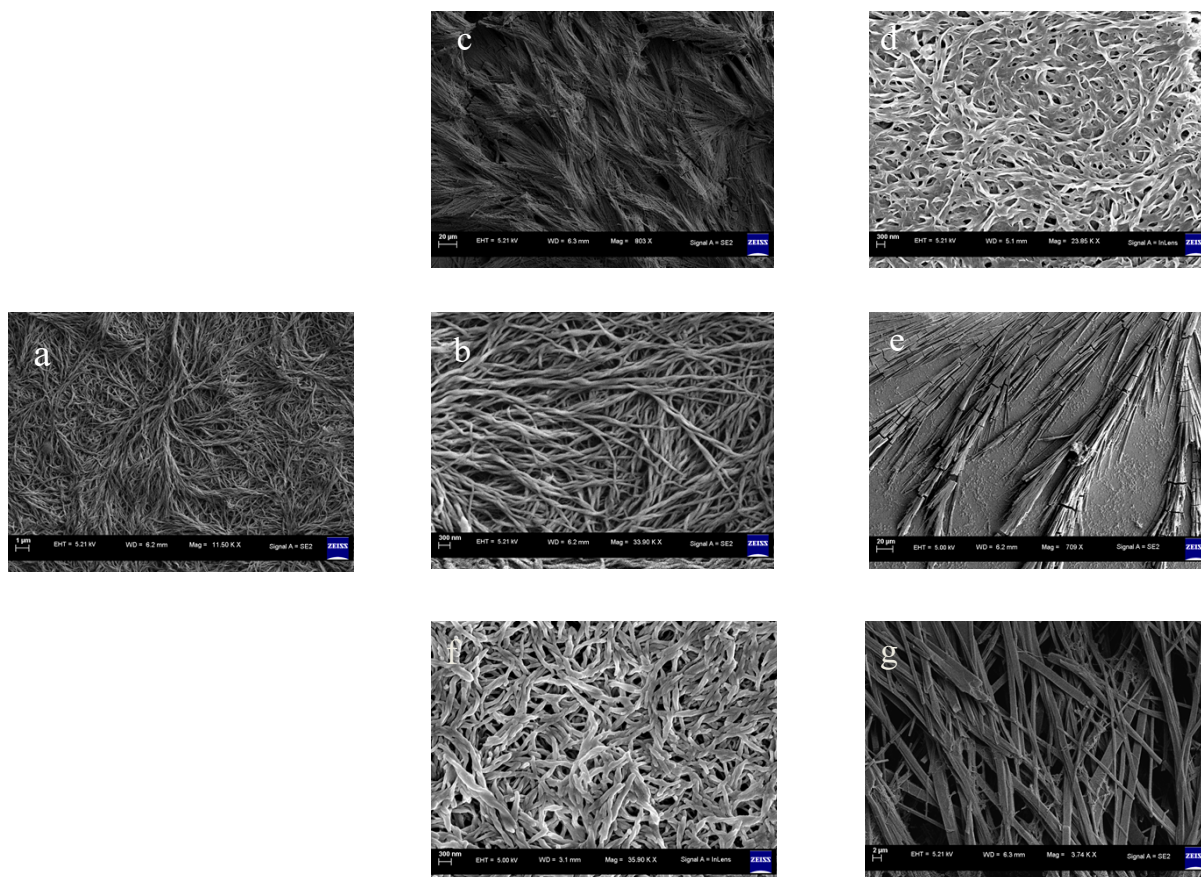

**Figure S3:** FE-SEM image of all gel and solution (a) FE-SEM image of xerogel formed by low-molecular-weight gelator 1 in DMF (b) FE-SEM image of DMF solution formed by low-molecular-weight gelator 1 (c) FE-SEM image xerogel formed by compound 1 with  $\beta$ -CD (d) FE-SEM image of sol at 85°C without  $K_2CO_3$ . (e) FE-SEM image of xerogelB formed with  $\beta$ -CD and  $K_2CO_3$  (f) FE-SEM image of xerogelA. (g) FE-SEM image of solution form by gelA at 58°C.

**Procedure of sample preparation for  $^1H$ -NMR:** At first we have prepared a gel (gelA) in NMR tube by compound 1 with  $\beta$ -CD/ $\alpha$ -CD/ $\gamma$ -CD and  $K_2CO_3$  in DMF- $D_7$  at room temperature, then we have taken NMR data. After that we have heated these gels around 90°C and taken NMR.

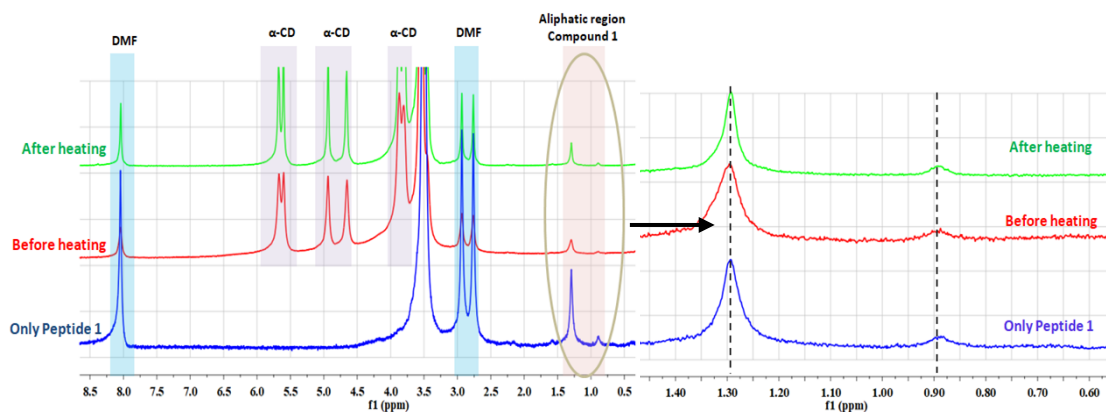

**Figure**

**S4:** <sup>1</sup>H-NMR (500 MHz, DMF-D<sub>7</sub>, δ in ppm) of Peptide **1**, before and after heating with α-CD.

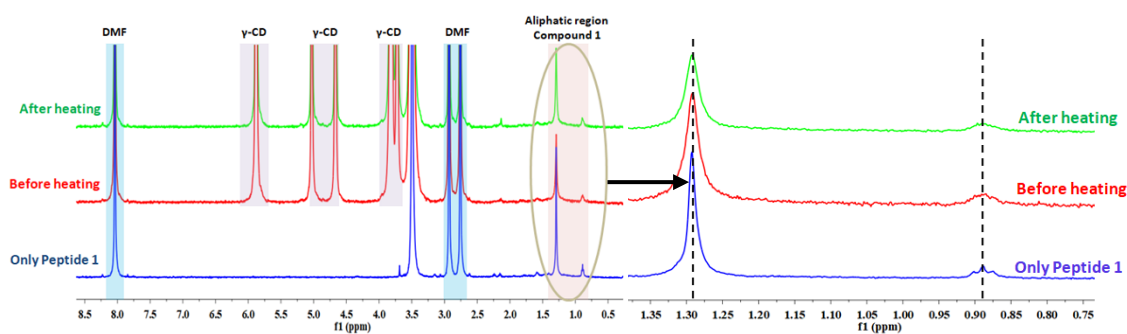

**Fig**

**ure S5:** <sup>1</sup>H-NMR (500 MHz, DMF-D<sub>7</sub>, δ in ppm) of Peptide **1**, before and after heating with γ-CD.

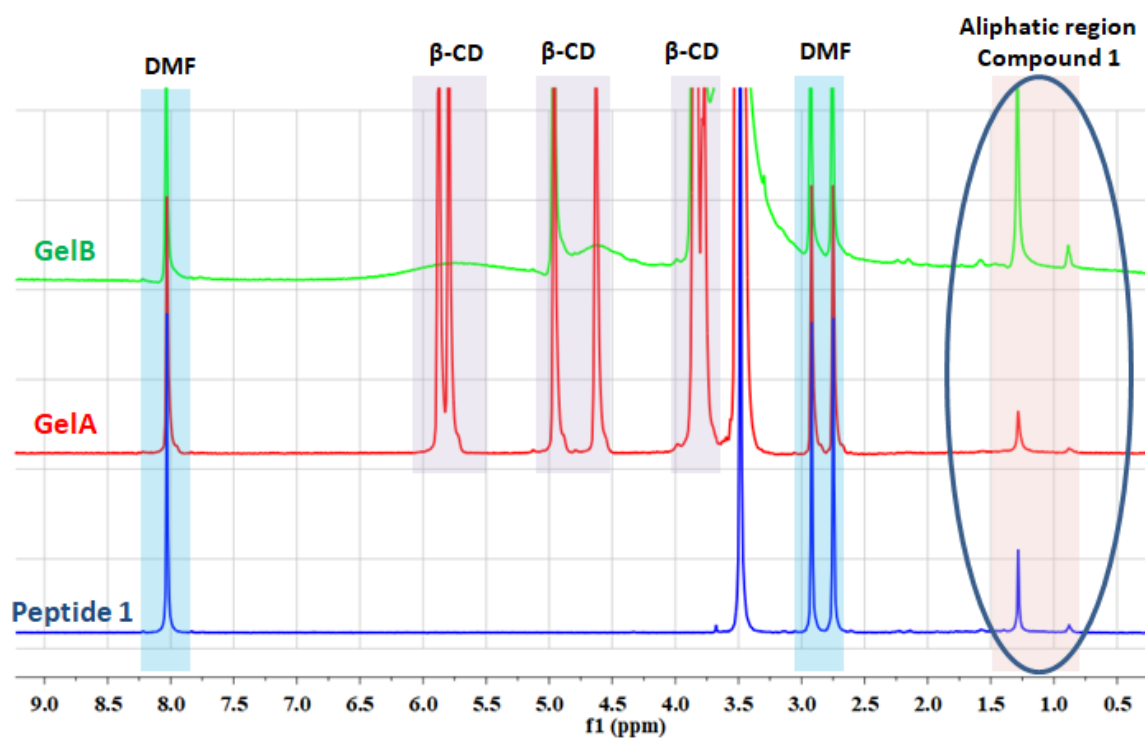

Fi

Figure S6: <sup>1</sup>H-NMR(500 MHz, DMF-D<sub>7</sub>, δ in ppm )of Peptide 1, GelA, GelB with β-CD.

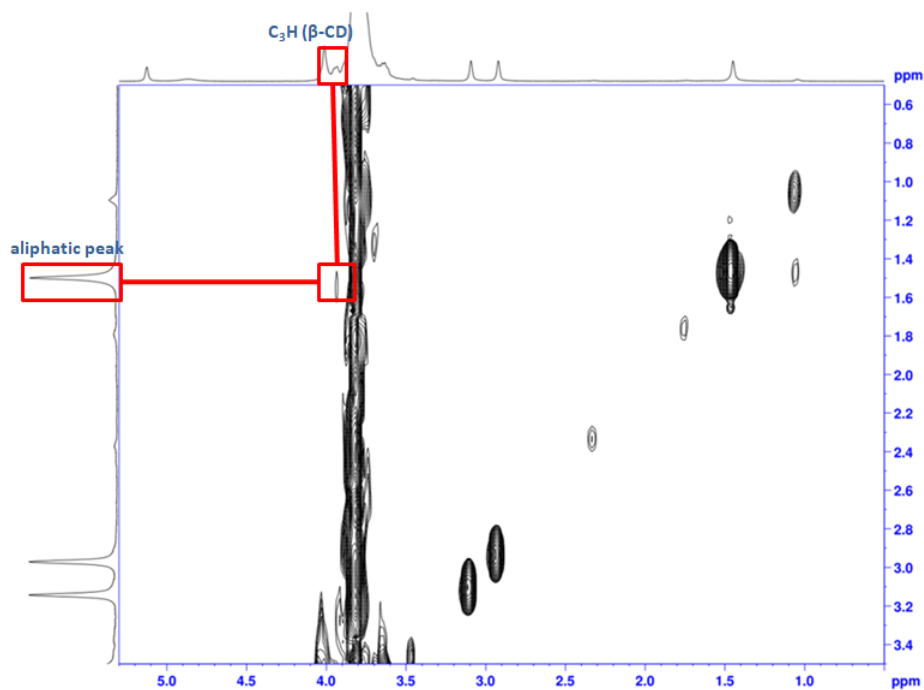

Figure S7: 2D COSY NMR spectrum of heat set gelB (500 MHz, DMF-D<sub>7</sub>, δ in ppm). cross peak between the inner protons C(3)-H of βCD and peptide 1.

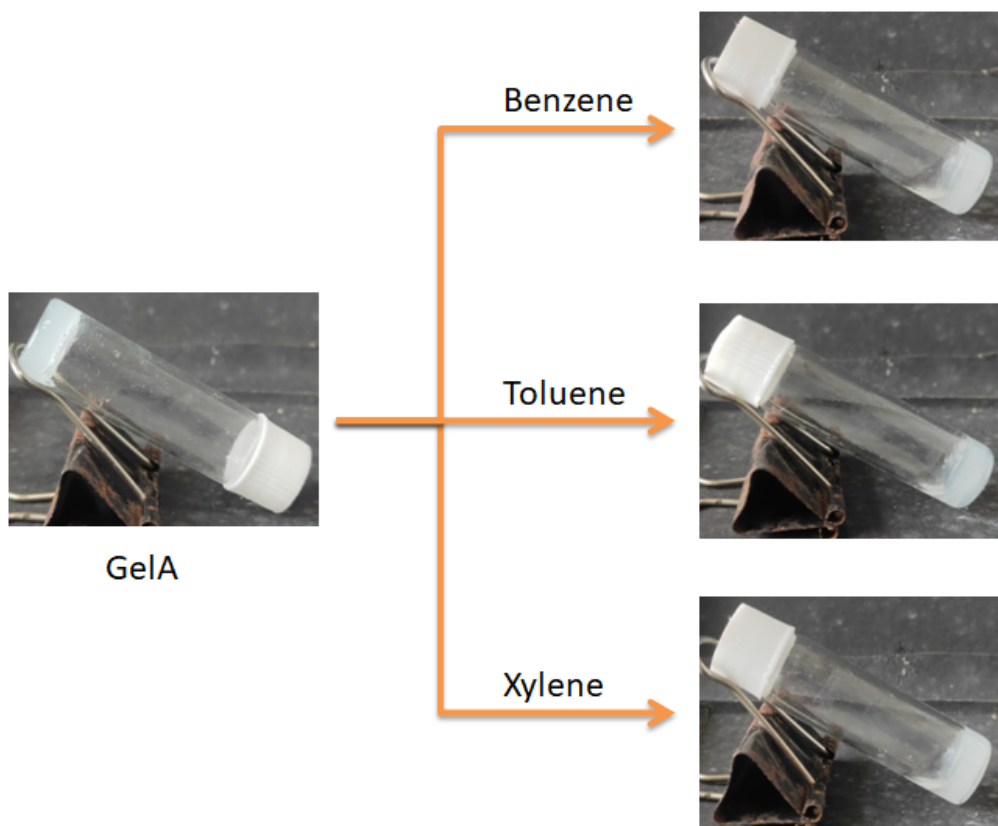

**Figure S8:** The guest molecules like benzene, toluene, xylene do not have effect on gelA. No sol to gel conversion on addition of these guests.

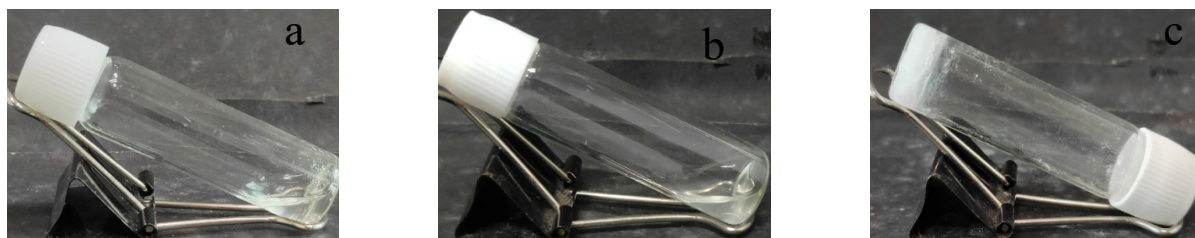

**Figure S9.** (a) Sol in presence of  $\alpha$ -CD at high temperature (we heated upto 100 °C); (b) Sol in presence of  $\gamma$ -CD at high temperature (we heated upto 100 °C); (c) gelB form with  $\beta$ -CD at 86 °C.

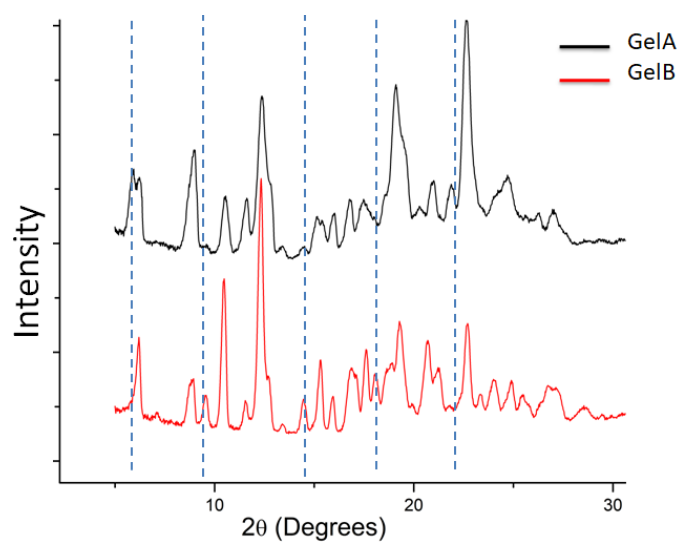

**Fig. S10:**Comparable PXRD pattern of gelA and gelB

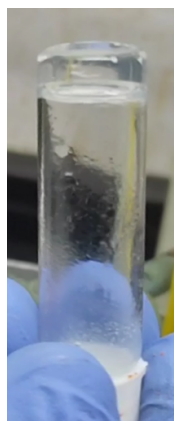

**Fig. S11:** Image of transparent gel form by only compound 1.

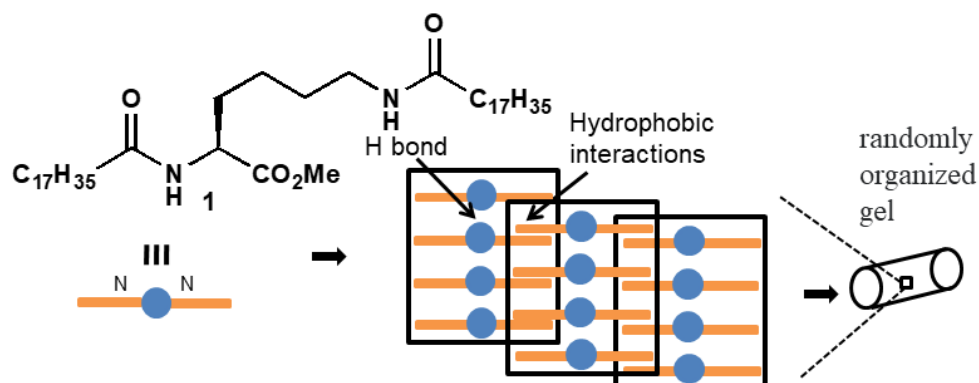

**Fig. S12:** Tentative model for the structure of randomly organized gelA of compound 1.

## Synthesis of Compound 1.

**Synthesis of stearic acid appended L-lysine:** 1.194 g (4.2 mmol) of stearic acid dissolved in minimum DMF and 30 ml DCM and kept in an ice bath and 0.466 g (2 mmol) of Lyn-OMe.HCl (which was isolated from acid protection reaction of L-lysine by  $\text{SOCl}_2$ , MeOH) was added followed by 0.802 g (4.2 mmol) EDC.HCl and 0.567 g (4.2 mmol) HOBt and 2 ml DIPEA. The reaction mixture was kept at room temperature and stirred for 2 days. Then DCM evaporated and the residue was dissolved in ethyl acetate (60 mL); organic layer washed with 2 M HCl ( $3 \times 50$  mL) and 1 M  $\text{Na}_2\text{CO}_3$  ( $3 \times 50$  mL), then collected the precipitated.

### The synthetic procedure of stearic acid appended L-lysine:

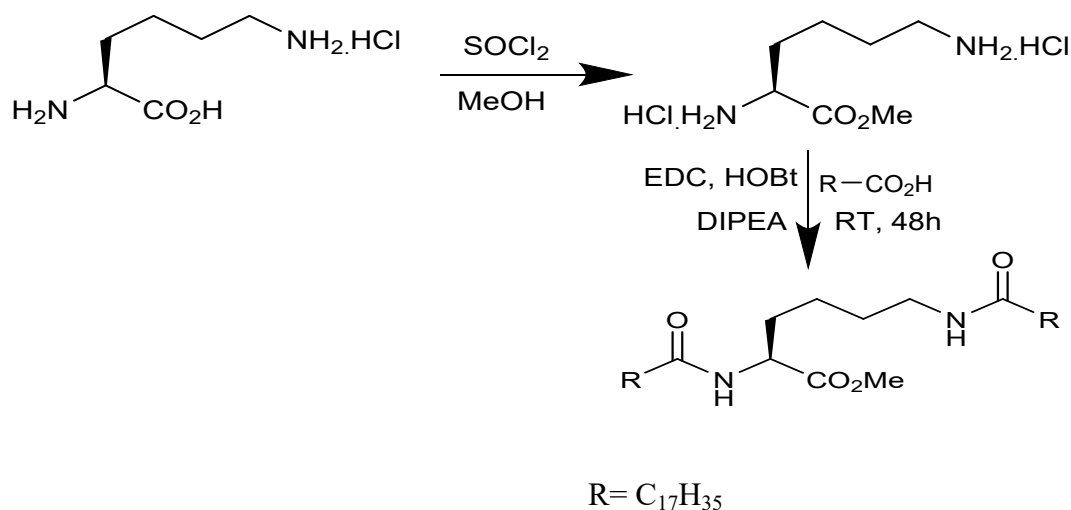

**Figure S13:** The proposed scheme for the synthesis of stearic acid appended L-lysine 1.



### Characterization of stearic acid appended L-lysine 1:

<sup>1</sup>H NMR (400 MHz, CDCl<sub>3</sub>, δ in ppm, 298K): 6.20(d, 1H, NH), 5.71(s, 1H, NH), 4.55(m, 1H, Cα-H), 3.72(s, 3H, OCH<sub>3</sub>), 3.22(m, 2H, Cβ-H), 2.21(t, 2H, CH<sub>2</sub>), 2.14(t, 2H, CH<sub>2</sub>), 1.87(m, 2H, CH<sub>2</sub>), 1.71-1.13(m, 64H, aliphatic proton) 0.849(t, 6H, CH<sub>3</sub> proton). <sup>13</sup>C NMR (100 MHz, CDCl<sub>3</sub>, δ ppm): 173.63, 173.42, 173.20, 52.49, 51.74, 38.79, 38.96, 36.67, 36.96, 32.05, 29.81, 29.49, 28.97, 25.96, 25.76, 22.80, 22.41, 14.24 ESI-MS (MeOH): m/z (Calc): C<sub>43</sub>H<sub>84</sub>N<sub>2</sub>O<sub>4</sub>Na [M+Na]<sup>+</sup> 715.64; found: 715.63. Yield: 55%. white colour solid.

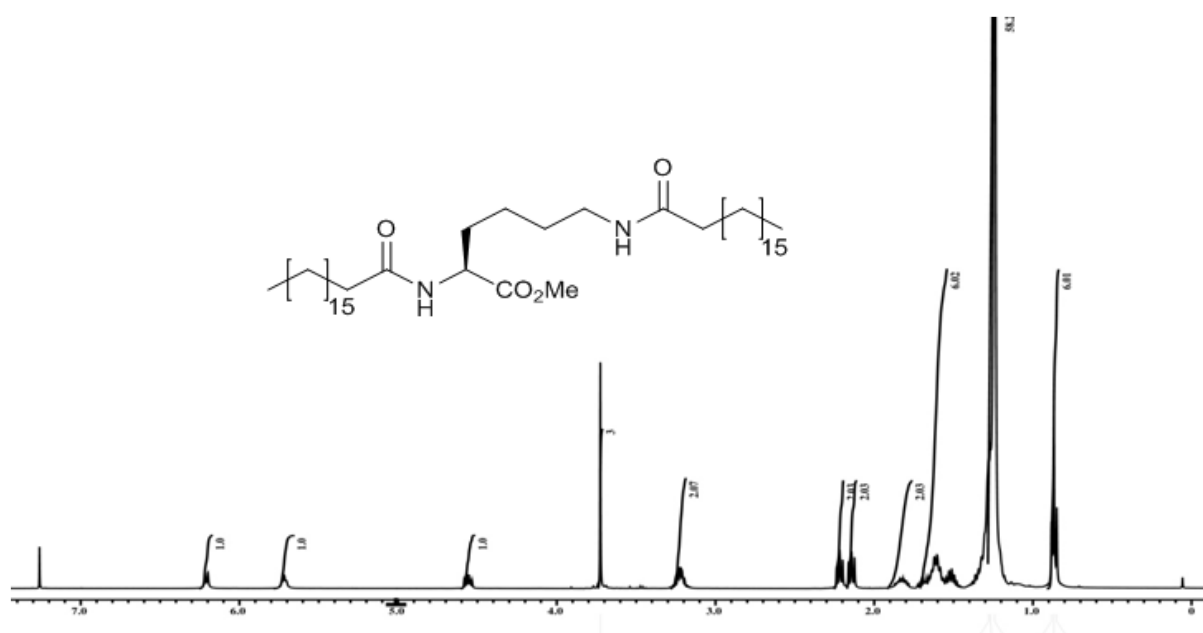

**Figure S14:**  $^1\text{H}$  NMR (400 MHz,  $\text{CDCl}_3$ ,  $\delta$  in ppm, 298K) spectra of stearic acid appended lysine **1**.

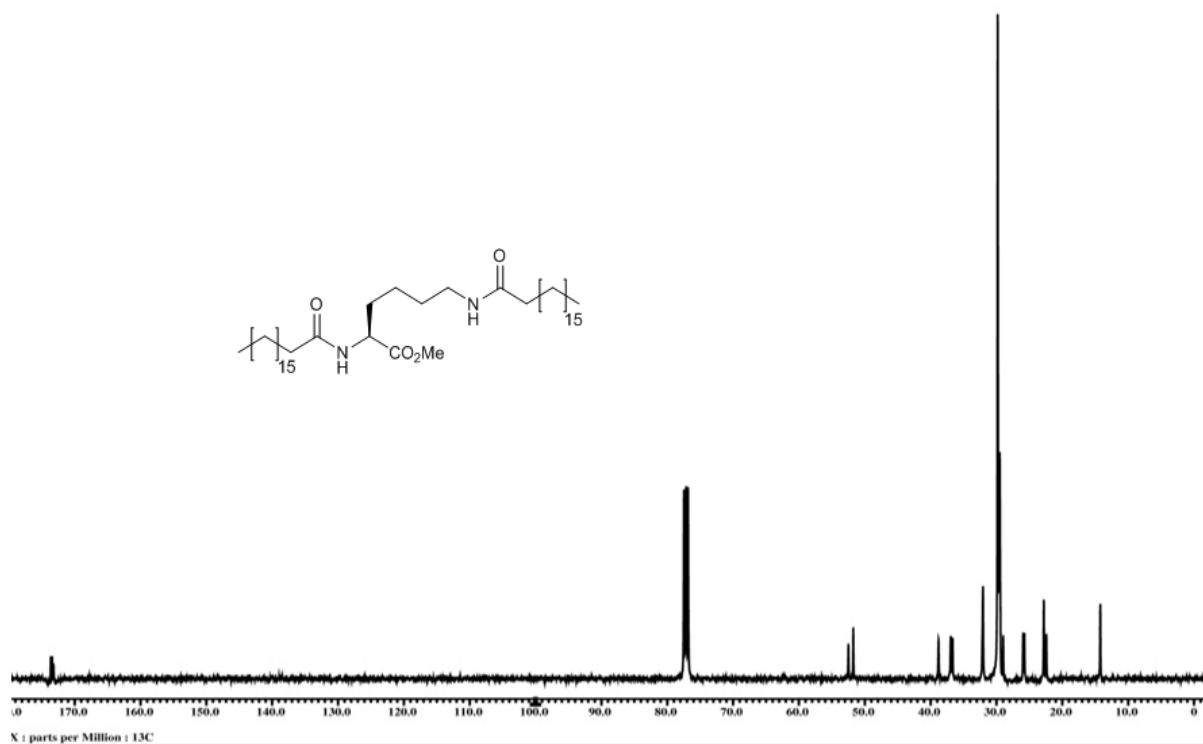

**Figure S15:** <sup>13</sup>C NMR (100 MHz, CDCl<sub>3</sub>, δ in ppm, 298K) spectra of stearic acid appended L-lysine 1.

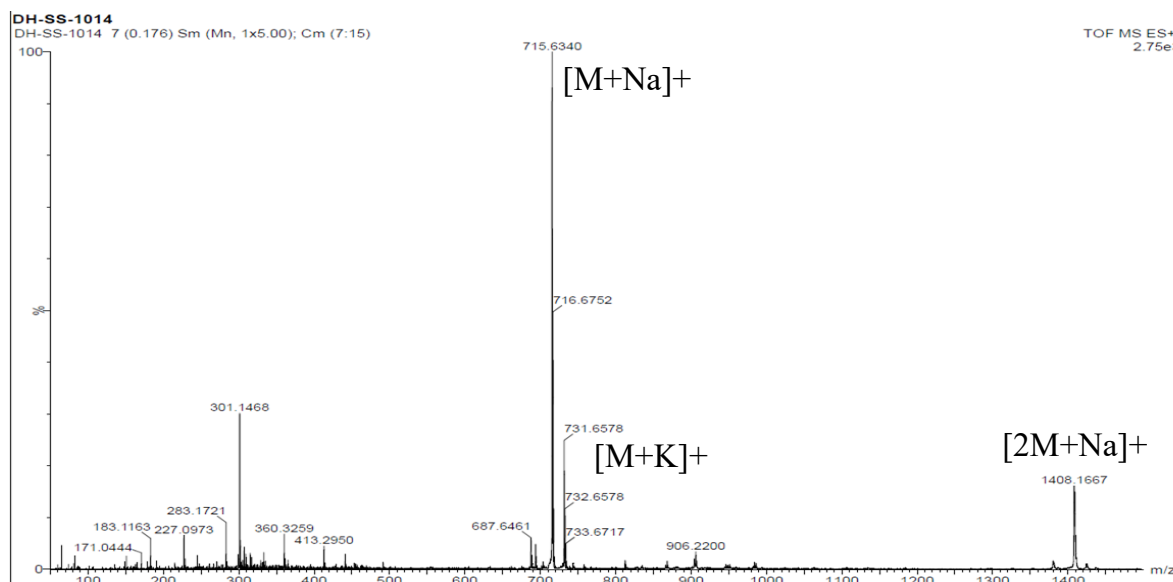

**Figure S16:** ESI-MS spectra of stearic acid appended L-lysine 1.

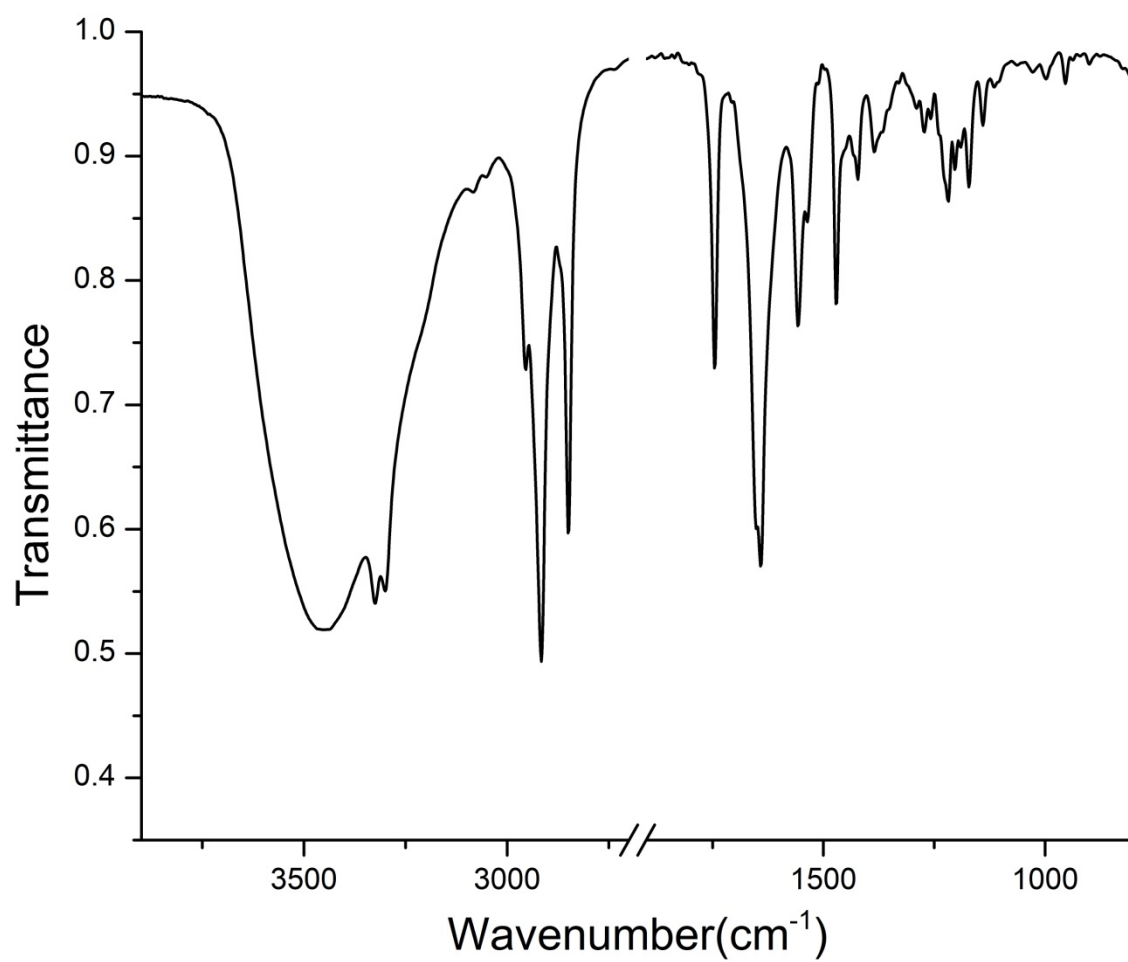

**Figure S17:** FT-IR spectra of stearic acid appended L-lysine **1**.
